# Supplementary material for: Isolation of an intermediate in the insertion of a carbodiimide into a boron-aryl bond
Source: Royal Society of Chemistry journal article supplement (doi:10.1039/b511080g), 2005-01-01
Supplement: b511080g.pdf [file b511080g.pdf]

## **Supporting Information for**

# **Isolation of an intermediate in the insertion of a carbodiimide into a boron-aryl bond**

**Nicholas J. Hill, Jennifer A. Moore, Michael Findlater and Alan H. Cowley\***

*Department of Chemistry and Biochemistry, The University of Texas at Austin, 1 University Station A5300, Austin, Texas 78712, USA. E-mail: [cowley@mail.utexas.edu](mailto:cowley@mail.utexas.edu); FAX: (+1)512-471-6822; Tel: (+1)512-471-7484.*

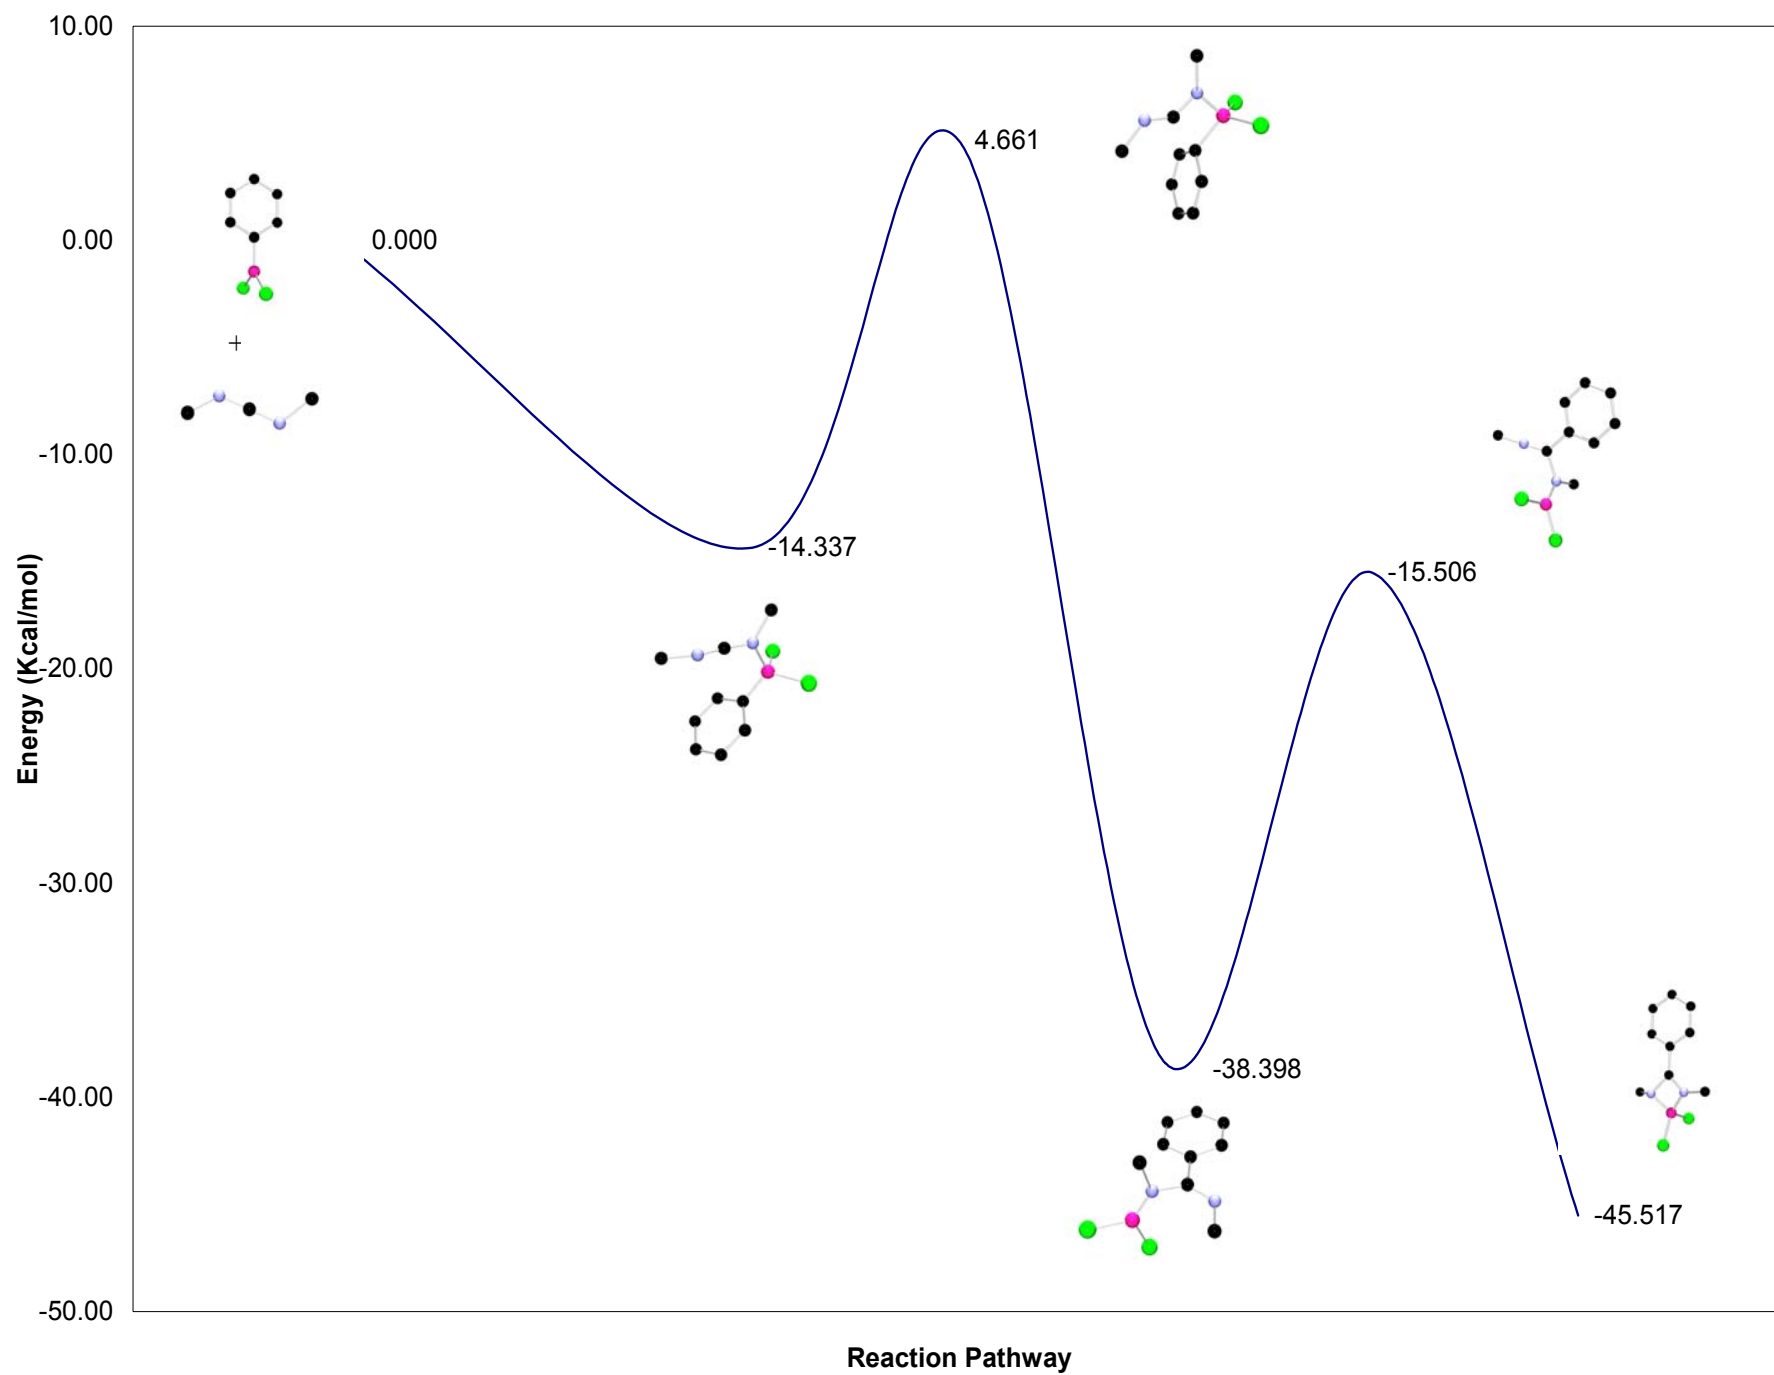

## IM1

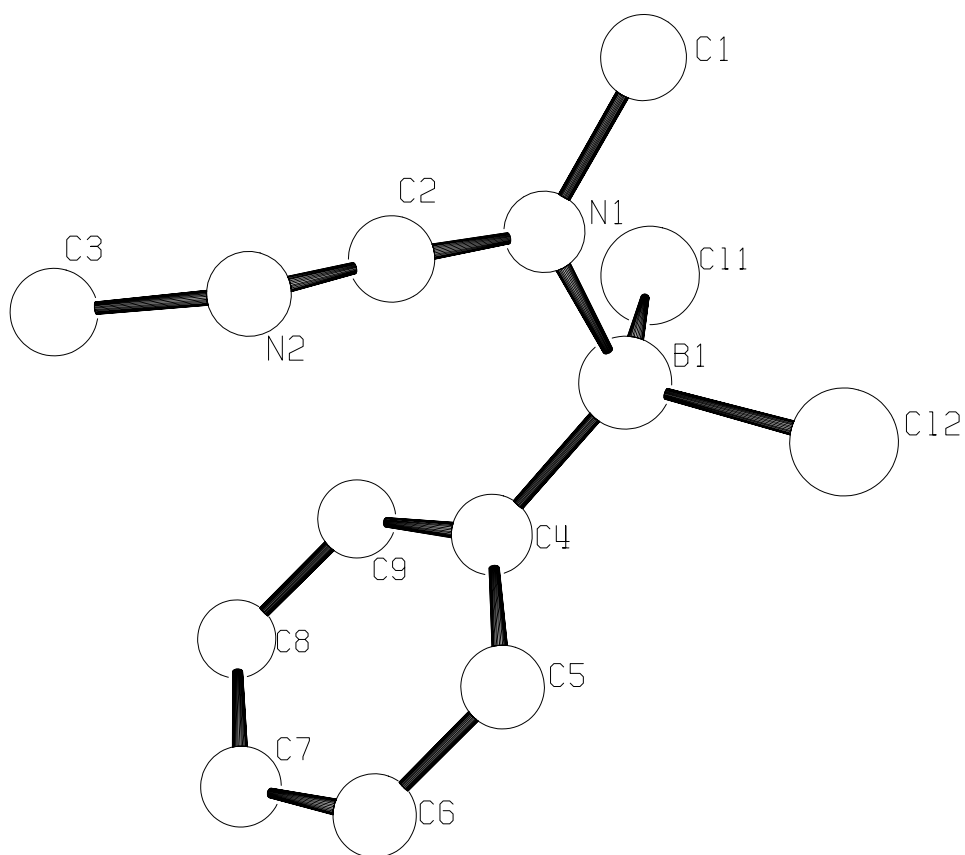

# IM1

| Bond             | (Å)       | Angle             | Degrees | Dihedral             | Degrees |
|------------------|-----------|-------------------|---------|----------------------|---------|
| B(1)-Cl(1)       | 1.88485   | Cl(1)- B(1)-Cl(2) | 110.876 | Cl(2)-B(1)-N(1)-C(3) | 0.721   |
| B(1)-Cl(2)       | 1.87425   | Cl(1)- B(1)-N(1)  | 104.316 | C(2)-N(2)-C(3)-N(1)  | 152.219 |
| B(1)-N(1)        | 1.64181   | Cl(2)- B(1)-N(1)  | 105.025 |                      |         |
| N(1)-C(1)        | 1.50502   | B(1)-N(1)-C(3)    | 118.355 |                      |         |
| N(1)-C(3)        | 1.26819   | B(1)-N(1)-C(1)    | 119.619 |                      |         |
| N(2)-C(3)        | 1.18587   | N(1)-C(3)-N(2)    | 174.860 |                      |         |
| B(1)-C(4)        | 1.60005   | C(2)-N(2)-C(3)    | 143.645 |                      |         |
| N(2)-C(2)        | 1.46217   | C(4)-B(1)-N(1)    | 107.486 |                      |         |
| C(4)-C(5)        | 1.40746   |                   |         |                      |         |
| C(5)-C(6)        | 1.39700   |                   |         |                      |         |
| C(6)-C(7)        | 1.39675   |                   |         |                      |         |
| C(7)-C(8)        | 1.39856   |                   |         |                      |         |
| C(8)-C(9)        | 1.39744   |                   |         |                      |         |
| C(9)-C(4)        | 1.41105   |                   |         |                      |         |
|                  |           |                   |         |                      |         |
|                  |           |                   |         |                      |         |
| Orbital energies | Kcal/mole |                   |         |                      |         |
| HOMO             | LUMO      | HOMO-LUMO GAP     |         |                      |         |
| -156.24          | -31.0371  | -125.203          |         |                      |         |

IM1

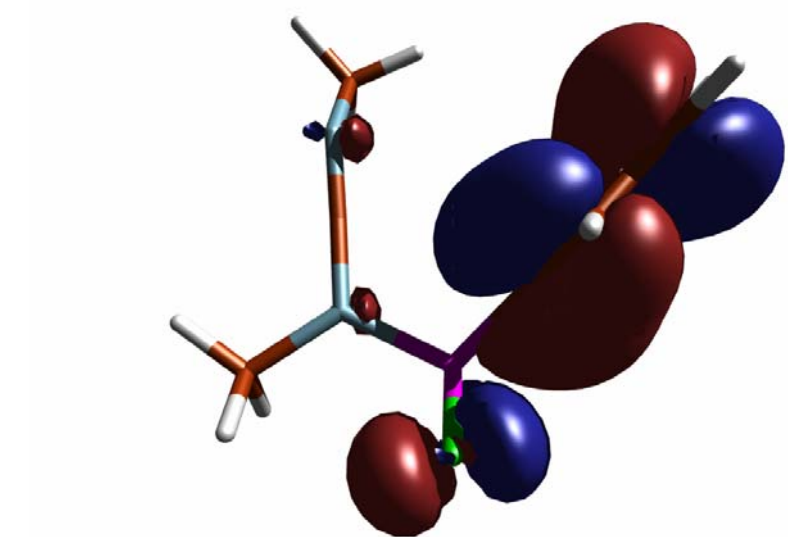

HOMO

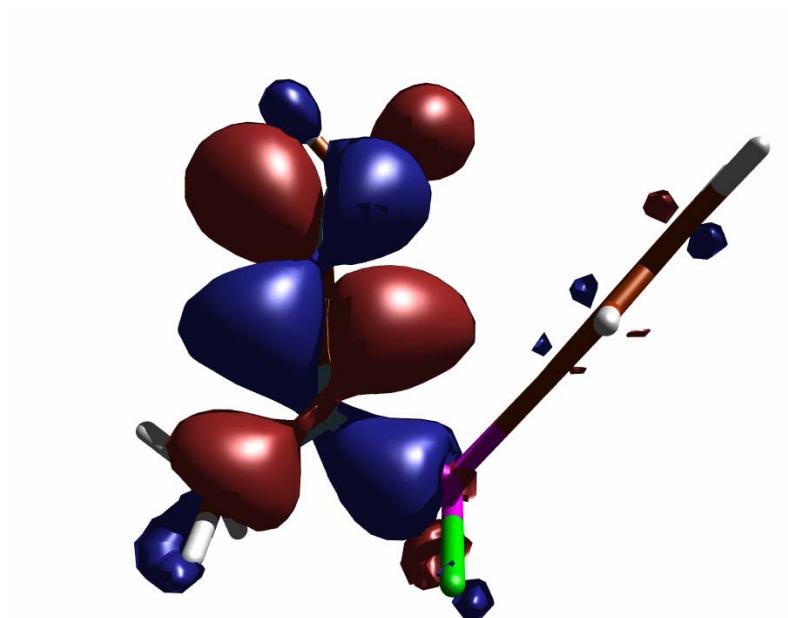

LUMO

# TS1

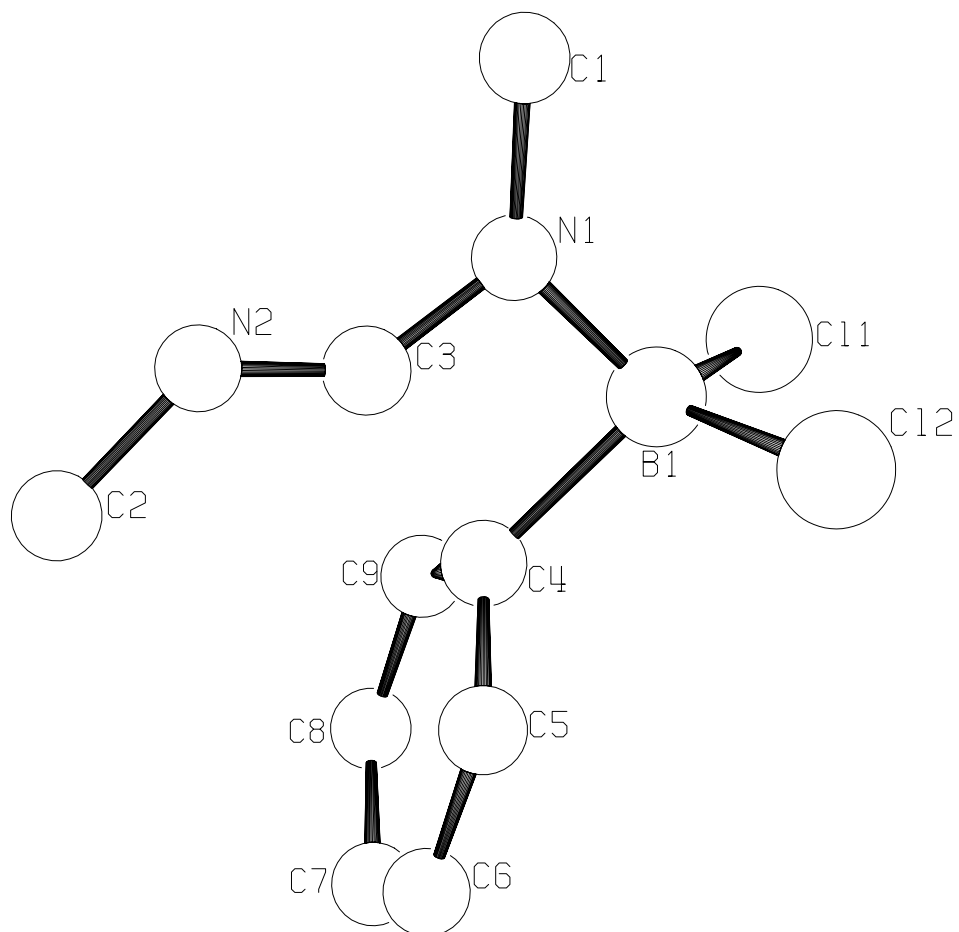

# TS1

| Bond             | (Å)       | Angle             | Degrees | Dihedral             | Degrees |
|------------------|-----------|-------------------|---------|----------------------|---------|
| B(1)-Cl(1)       | 1.86145   | Cl(1)- B(1)-Cl(2) | 111.57  | Cl(2)-B(1)-N(1)-C(3) | -105.16 |
| B(1)-Cl(2)       | 1.84707   | Cl(1)- B(1)-N(1)  | 115.007 | C(2)-N(2)-C(3)-N(1)  | 3.434   |
| B(1)-N(1)        | 1.51956   | Cl(2)- B(1)-N(1)  | 113.692 |                      |         |
| N(1)-C(1)        | 1.47046   | B(1)-N(1)-C(3)    | 99.365  |                      |         |
| N(1)-C(3)        | 1.33753   | B(1)-N(1)-C(1)    | 133.479 |                      |         |
| N(2)-C(3)        | 1.23627   | N(1)-C(3)-N(2)    | 140.070 |                      |         |
| C(3)-C(4)        | 1.87103   | C(2)-N(2)-C(3)    | 130.893 |                      |         |
| N(2)-C(2)        | 1.45212   | N(2)-C(3)-C(4)    | 125.025 |                      |         |
| C(4)-C(5)        | 1.42746   | N(1)-C(3)-C(4)    | 94.883  |                      |         |
| C(5)-C(6)        | 1.39115   |                   |         |                      |         |
| C(6)-C(7)        | 1.39996   |                   |         |                      |         |
| C(7)-C(8)        | 1.40198   |                   |         |                      |         |
| C(8)-C(9)        | 1.38733   |                   |         |                      |         |
| C(9)-C(4)        | 1.43040   |                   |         |                      |         |
|                  |           |                   |         |                      |         |
|                  |           |                   |         |                      |         |
| Orbital energies | Kcal/mole |                   |         |                      |         |
| HOMO             | LUMO      | HOMO-LUMO GAP     |         |                      |         |
| -156.918         | -71.3678  | 85.5498           |         |                      |         |

TS1

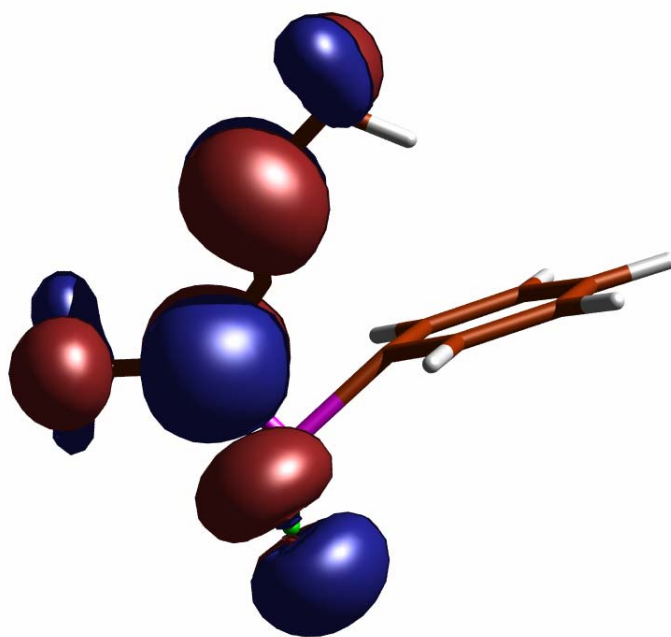

HOMO

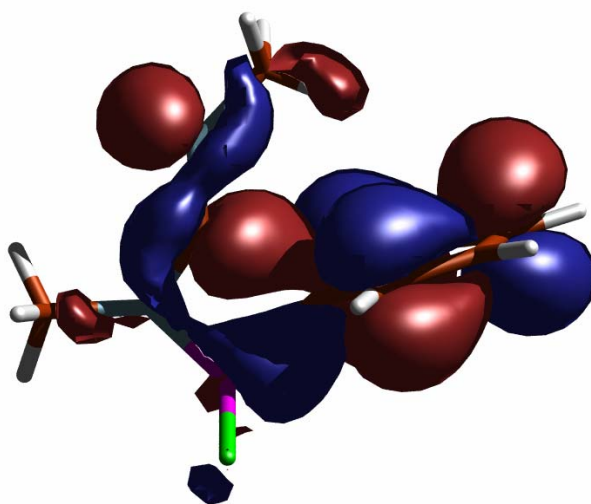

LUMO



## IM2

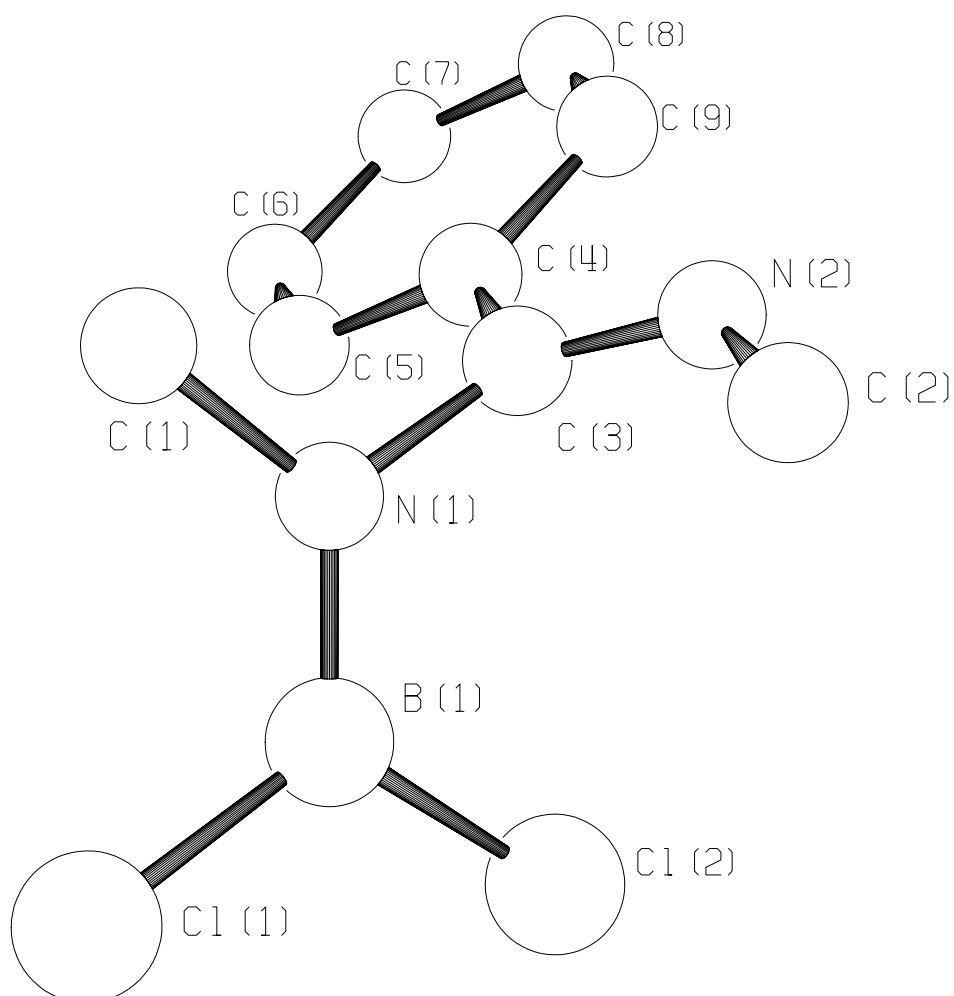

## IM2

| Bond             | (Å)       | Angle             | Degrees | Dihedral             | Degrees |
|------------------|-----------|-------------------|---------|----------------------|---------|
| B(1)-Cl(1)       | 1.78458   | Cl(1)- B(1)-Cl(2) | 117.386 | Cl(2)-B(1)-N(1)-C(3) | -2.142  |
| B(1)-Cl(2)       | 1.77938   | Cl(1)- B(1)-N(1)  | 121.700 | C(2)-N(2)-C(3)-N(1)  | 2.232   |
| B(1)-N(1)        | 1.39817   | Cl(2)- B(1)-N(1)  | 120.912 |                      |         |
| N(1)-C(1)        | 1.47038   | B(1)-N(1)-C(3)    | 122.142 |                      |         |
| N(1)-C(3)        | 1.45857   | B(1)-N(1)-C(1)    | 125.157 |                      |         |
| N(2)-C(3)        | 1.27197   | N(1)-C(3)-N(2)    | 123.604 |                      |         |
| C(3)-C(4)        | 1.49127   | C(2)-N(2)-C(3)    | 122.794 |                      |         |
| N(2)-C(2)        | 1.44714   | N(2)-C(3)-C(4)    | 120.267 |                      |         |
| C(4)-C(5)        | 1.40373   | N(1)-C(3)-C(4)    | 116.083 |                      |         |
| C(5)-C(6)        | 1.39723   |                   |         |                      |         |
| C(6)-C(7)        | 1.39604   |                   |         |                      |         |
| C(7)-C(8)        | 1.40022   |                   |         |                      |         |
| C(8)-C(9)        | 1.39265   |                   |         |                      |         |
| C(9)-C(4)        | 1.40680   |                   |         |                      |         |
|                  |           |                   |         |                      |         |
|                  |           |                   |         |                      |         |
| Orbital energies | Kcal/mole |                   |         |                      |         |
| HOMO             | LUMO      | HOMO-LUMO GAP     |         |                      |         |
| -159.516         | -38.2411  | 121.277           |         |                      |         |

**IM2**

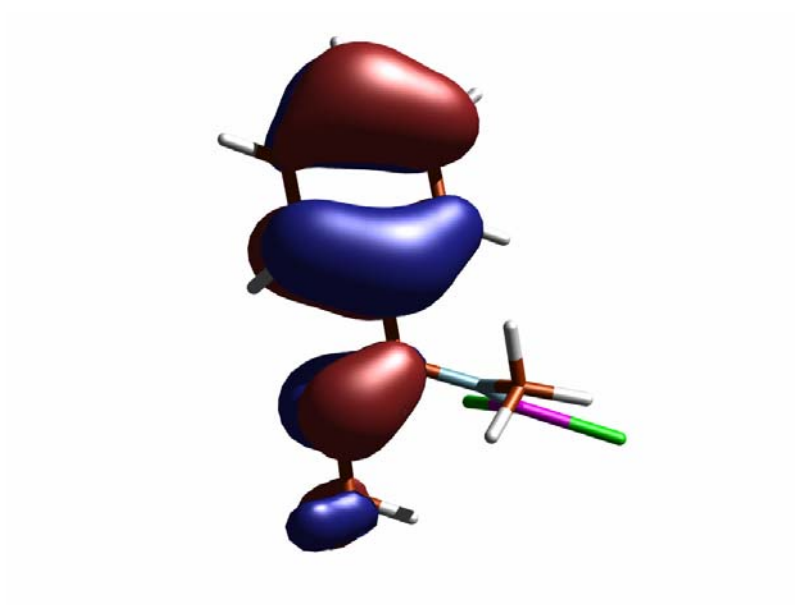

HOMO

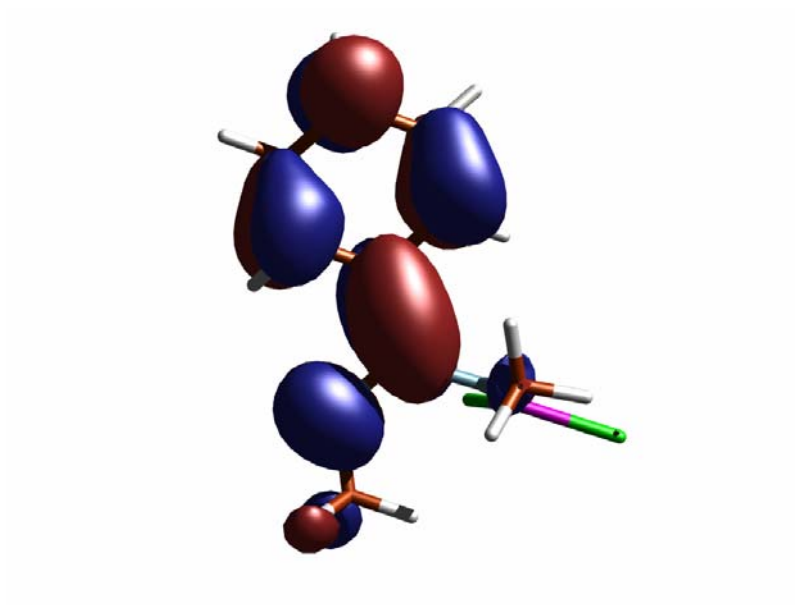

LUMO

## TS2

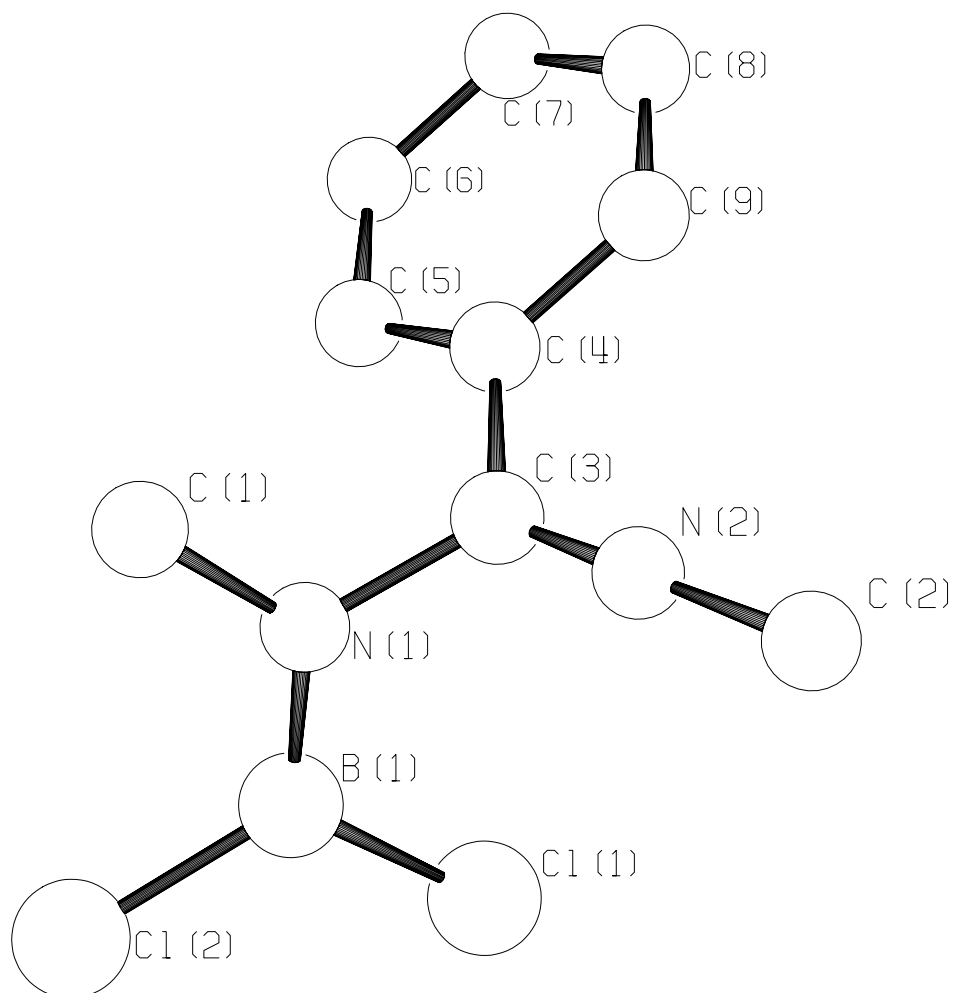

| Bond             | (Å)       | Angle             | Degrees | Dihedral             | Degrees |
|------------------|-----------|-------------------|---------|----------------------|---------|
| B(1)-Cl(1)       | 1.79033   | Cl(1)- B(1)-Cl(2) | 117.387 | Cl(2)-B(1)-N(1)-C(3) | 112.201 |
| B(1)-Cl(2)       | 1.78326   | Cl(1)- B(1)-N(1)  | 121.429 | C(2)-N(2)-C(3)-N(1)  | 115.693 |
| B(1)-N(1)        | 1.40003   | Cl(2)- B(1)-N(1)  | 121.178 |                      |         |
| N(1)-C(1)        | 1.49151   | B(1)-N(1)-C(3)    | 122.217 |                      |         |
| N(1)-C(3)        | 1.51668   | B(1)-N(1)-C(1)    | 124.954 |                      |         |
| N(2)-C(3)        | 1.23026   | N(1)-C(3)-N(2)    | 121.526 |                      |         |
| C(3)-C(4)        | 1.50150   | C(2)-N(2)-C(3)    | 179.968 |                      |         |
| N(2)-C(2)        | 1.41915   | N(2)-C(3)-C(4)    | 126.261 |                      |         |
| C(4)-C(5)        | 1.40188   | N(1)-C(3)-C(4)    | 112.201 |                      |         |
| C(5)-C(6)        | 1.39585   |                   |         |                      |         |
| C(6)-C(7)        | 1.39632   |                   |         |                      |         |
| C(7)-C(8)        | 1.39889   |                   |         |                      |         |
| C(8)-C(9)        | 1.39190   |                   |         |                      |         |
| C(9)-C(4)        | 1.40281   |                   |         |                      |         |
|                  |           |                   |         |                      |         |
|                  |           |                   |         |                      |         |
| Orbital energies | Kcal/mole |                   |         |                      |         |
| HOMO             | LUMO      | HOMO-LUMO GAP     |         |                      |         |
| -140.401         | -37.3751  | 103.026           |         |                      |         |

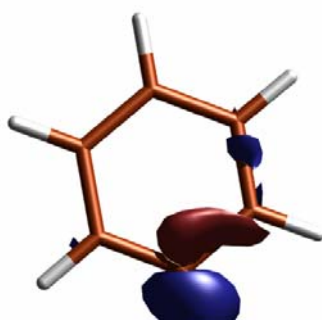

TS2

HOMO

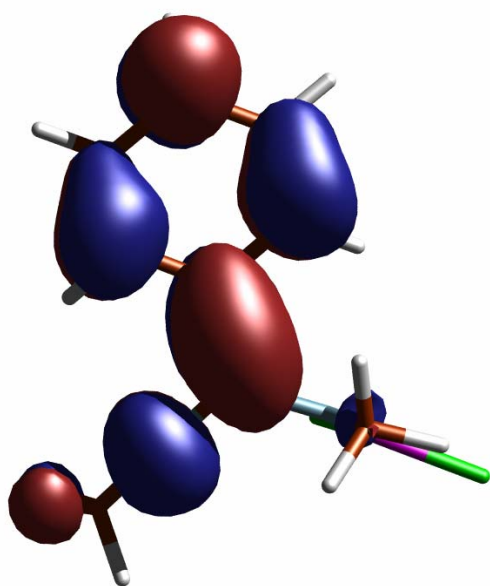

LUMO

3

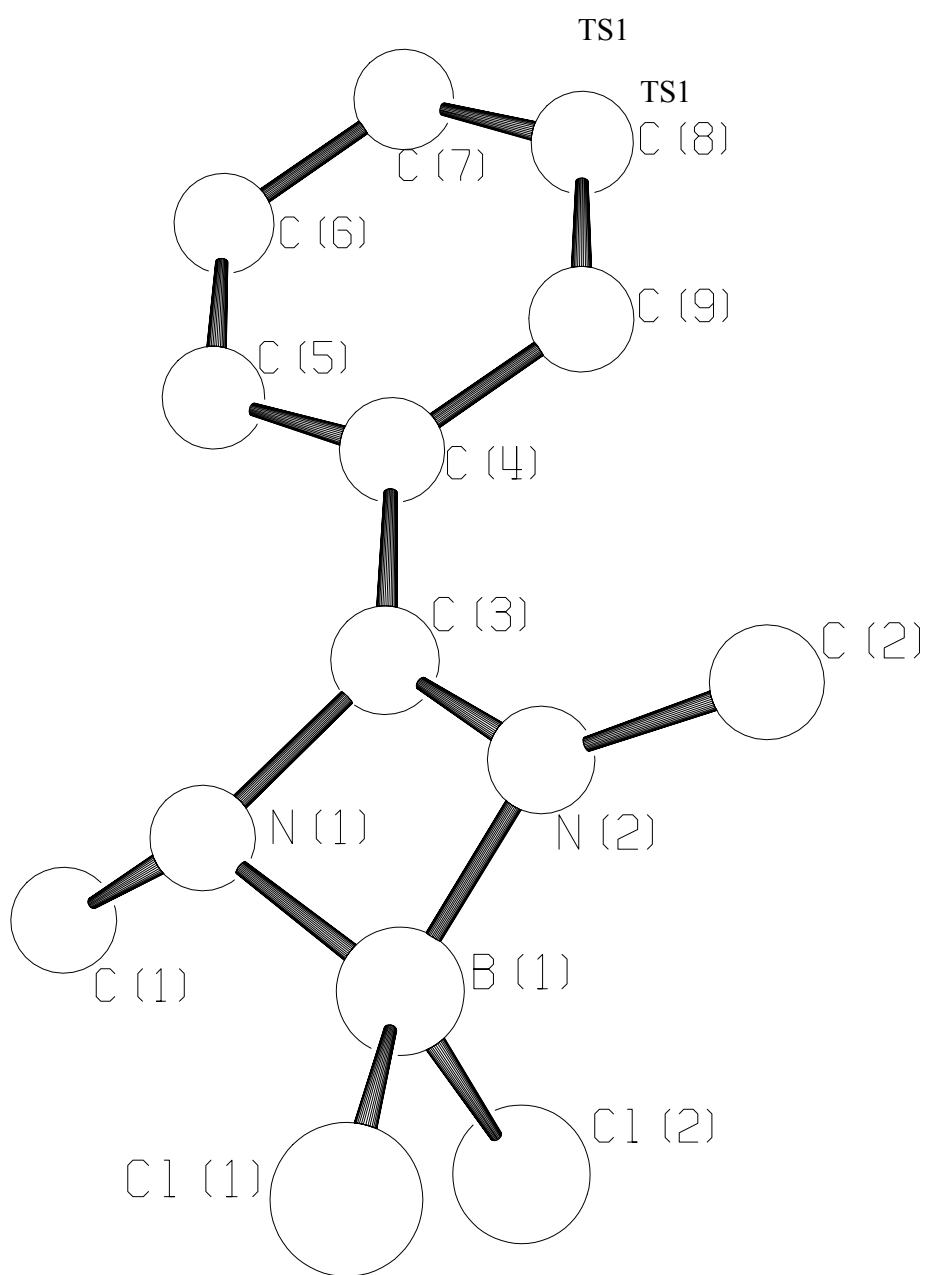

### 3

| Bond             | (Å)       | Angle             | Degrees | Dihedral             | Degrees  |
|------------------|-----------|-------------------|---------|----------------------|----------|
| B(1)-Cl(1)       | 1.87000   | Cl(1)- B(1)-Cl(2) | 105.863 | Cl(2)-B(1)-N(1)-C(3) | 138.635  |
| B(1)-Cl(2)       | 1.87000   | Cl(1)- B(1)-N(1)  | 118.857 | C(2)-N(2)-C(3)-N(1)  | -163.444 |
| B(1)-N(1)        | 1.54054   | Cl(2)- B(1)-N(1)  | 113.456 |                      |          |
| N(1)-C(1)        | 1.74000   | B(1)-N(1)-C(3)    | 84.720  |                      |          |
| N(1)-C(3)        | 1.50419   | B(1)-N(1)-C(1)    | 120.395 |                      |          |
| N(2)-C(3)        | 1.33736   | N(1)-C(3)-N(2)    | 94.960  |                      |          |
| C(3)-C(4)        | 1.54000   | C(2)-N(2)-C(3)    | 134.838 |                      |          |
| N(2)-C(2)        | 1.47000   | N(2)-C(3)-C(4)    | 132.537 |                      |          |
| C(4)-C(5)        | 1.40140   | N(1)-C(3)-C(4)    | 132.502 |                      |          |
| C(5)-C(6)        | 1.40140   | B(1)- N(2)-C(3)   | 90.321  |                      |          |
| C(6)-C(7)        | 1.40140   |                   |         |                      |          |
| C(7)-C(8)        | 1.40140   |                   |         |                      |          |
| C(8)-C(9)        | 1.40140   |                   |         |                      |          |
| C(9)-C(4)        | 1.40140   |                   |         |                      |          |
| B(1)-N(2)        | 1.54834   |                   |         |                      |          |
| B(1)-C(3)        | 2.05161   |                   |         |                      |          |
|                  |           |                   |         |                      |          |
| Orbital energies | Kcal/mole |                   |         |                      |          |
| HOMO             | LUMO      | HOMO-LUMO GAP     |         |                      |          |
| -155.248         | -47.4342  | 107.814           |         |                      |          |

\



3

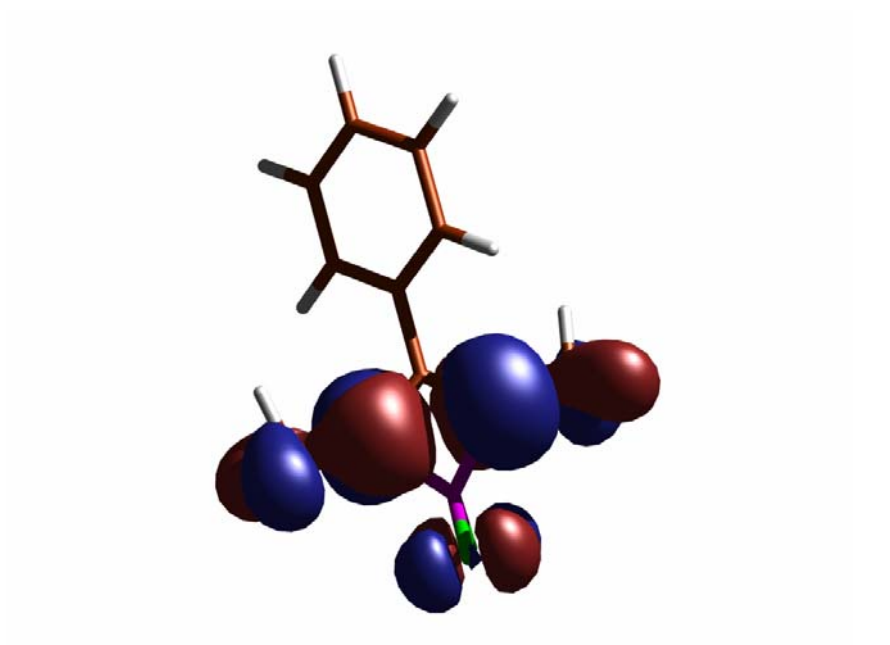

HOMO

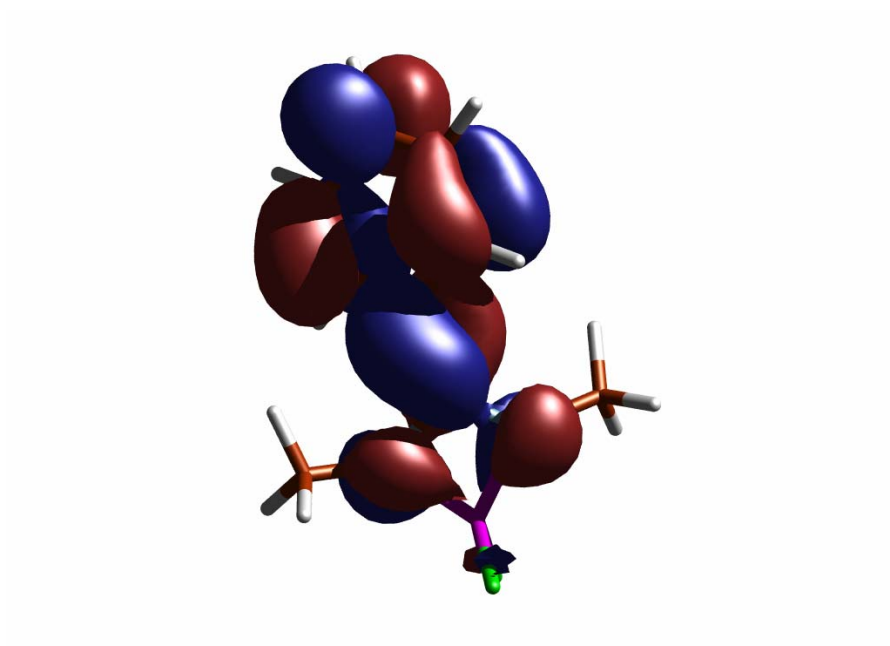

LUMO

## Experimental

### General procedures

All manipulations and reactions were performed under a dry, oxygen-free, catalyst-scrubbed argon atmosphere using a combination of standard Schlenk techniques or in an M-Braun or Vacuum Atmospheres drybox. All glassware was oven-dried and vacuum- and argon flow-degassed before use. All solvents were distilled over sodium benzophenone ketyl and degassed prior to use. 1,3-dicyclohexylcarbodiimide and dichlorophenylborane were obtained commercially and used without further purification.

### Physical measurements

Low-resolution CI mass spectra were obtained on a Finnigan MAT TSQ-700 mass spectrometer and high-resolution CI mass spectra recorded on a VG Analytical ZAB-VE sector instrument. All MS analyses were performed on samples that had been sealed in glass capillaries under an argon atmosphere.  $^1\text{H}$ ,  $^{13}\text{C}\{^1\text{H}\}$ , and  $^{11}\text{B}$  NMR spectra were recorded at 295 K in  $\text{C}_6\text{D}_6$  solutions on a GE QE-300 instrument ( $^1\text{H}$ , 300 MHz;  $^{13}\text{C}$ , 75 MHz,  $^{11}\text{B}$ , 96 MHz ) immediately following removal of the sample from the drybox.  $^1\text{H}$  and  $^{13}\text{C}\{^1\text{H}\}$  chemical shift values are reported in parts per million (ppm) relative to  $\text{SiMe}_4$  ( $\delta$  0.00), using residual solvent resonances as internal standards.  $^{11}\text{B}$  NMR data are referenced to  $\text{BF}_3\cdot\text{OEt}_2$  ( $\delta$  0.00). Melting points (uncorrected) were obtained on a Fisher-Johns apparatus after flame-sealing the samples in glass capillaries under argon.

## X-ray crystallography

For compounds **1** and **2**, a crystal of suitable quality was removed from a Schlenk flask under positive argon pressure, covered immediately with degassed hydrocarbon oil and mounted on a glass fiber. The X-ray diffraction data were collected at 153 K on a Nonius Kappa CCD diffractometer equipped with an Oxford Cryostream low-temperature device and a graphite-monochromated Mo K $\alpha$  radiation source ( $\lambda = 0.71073$  Å). Corrections were applied for Lorentz and polarization effects. All structures were solved by direct methods and refined by full-matrix least-squares cycles on  $F^2$ . All non-hydrogen atoms were allowed anisotropic thermal motion, and hydrogen atoms were placed in fixed, calculated positions using a riding model (C-H 0.96 Å).

## Preparations

**1.** A solution of PhBCl<sub>2</sub> (0.77 g, 4.85 mmol) in 5 mL of hexanes was added to a cold (-78 °C) stirred solution of CyN=C=NCy (1.00 g, 4.85 mmol) in 15 mL of hexane. The reaction mixture was warmed to room temperature, stirred for 2 h and the solvent was removed *in vacuo* to give a white powder. Recrystallization of this powder from toluene solution afforded colourless crystals of **1** (1.71 g, 96% yield, mp 110-112 °C).

<sup>1</sup>H NMR (C<sub>6</sub>D<sub>6</sub>):  $\delta$  7.39-7.19 (s, 5H); 3.13 (br s, 2H); 2.17 (br s, 4H); 1.68-0.95 (br m, 16H); <sup>13</sup>C NMR (C<sub>6</sub>D<sub>6</sub>):  $\delta$  154.34; 136.28; 133.93; 133.11; 58.52; 55.68; 33.95; 32.57; 31.26; 26.51; 26.37; 25.38; 25.04; 24.40; <sup>11</sup>B NMR (C<sub>6</sub>D<sub>6</sub>):  $\delta$  8.17 (s). MS (CI<sup>+</sup>, CH<sub>4</sub>):  $m/z$  364 (M<sup>+</sup>), 207 (100%, CyN=C=NCy + H<sup>+</sup>); HRMS (CI, CH<sub>4</sub>) calcd. for C<sub>19</sub>H<sub>27</sub>N<sub>2</sub>BCl<sub>2</sub>, 364.1644; found 364.1671.

**2.** <sup>n</sup>BuLi (3.2 mmol, 2.0 mL 1.6 M solution in hexanes) was added to a cold (-78 °C) stirred solution of PhBr (0.5 g, 3.2 mmol) in 15 mL of hexane. The reaction mixture was warmed to room temperature, stirred for 2 h and then re-cooled to -78 °C, whereupon a solution of CyN=C=NCy (0.66 g, 3.2 mmol) in 10 mL hexane was added dropwise. The mixture was again warmed to room temperature, stirred for 2 h and then re-cooled to -78 °C, followed by dropwise addition of BCl<sub>3</sub> (3.2 mmol, 3.2 mL 1.0 M solution in hexanes). After stirred reaction mixture had warmed to room temperature overnight, it was filtered through Celite<sup>®</sup> and the solvent stripped from the filtrate to afford a white powder. Recrystallization of this powder from toluene solution afforded a crop of colourless crystals of **2** (1.03 g, 88% yield, mp 90-92 °C).

<sup>1</sup>H NMR (C<sub>6</sub>D<sub>6</sub>): δ 3.49 (s, 2H); 2.09 (s, 4H); 1.67-1.45 (m, 10H); 1.14-1.05 (m, 6H).

<sup>13</sup>C{<sup>1</sup>H} NMR (C<sub>6</sub>D<sub>6</sub>): δ 176.17; 132.55; 129.79; 127.99; 54.95; 33.70; 27.23; 25.94. <sup>11</sup>B NMR (C<sub>6</sub>D<sub>6</sub>): δ 6.25 (s). MS (Cl<sup>+</sup>, CH<sub>4</sub>): *m/z* 364 (M<sup>+</sup>), 329 (100%, M – Cl); HRMS (Cl, CH<sub>4</sub>) calcd. for C<sub>19</sub>H<sub>27</sub>N<sub>2</sub>BCl<sub>2</sub>, 364.1644; found 364.1642.
